# Supplementary material for: Current Epidemiology and Co-Infections of Avian Immunosuppressive and Neoplastic Diseases in Chicken Flocks in Central China
Source: MDPI journal article supplement (doi:10.3390/v14122599), 2022-11-22
Supplement: s1 [file s1]

## Supplementary data

**Table S1** Detail data of three pathogen infections in chickens with suspected neoplastic diseases collected from poultry farms distributed in central China.

| No. | Poultry farms | Breeds            | Category | Positive rates of three pathogens |        |              |               |           |              |               |       |        |              |               |
|-----|---------------|-------------------|----------|-----------------------------------|--------|--------------|---------------|-----------|--------------|---------------|-------|--------|--------------|---------------|
|     |               |                   |          | MDV                               |        |              |               | ALV       |              |               | REV   |        |              |               |
|     |               |                   |          | Liver                             | Spleen | Cell culture | Positive rate | Anal swab | Cell culture | Positive rate | Liver | Spleen | Cell culture | Positive rate |
| 1   | HNZMD         | Liangfenghua      | Broiler  | 12/12                             | 12/12  | 6/6          | 100% (12/12)  | 0/0       | 6/6          | 100% (6/6)    | 0/0   | 0/0    | 6/6          | 100% (6/6)    |
| 2   | HNXZ1         | Partridge chicken | Layer    | 6/6                               | 5/6    | 6/6          | 100% (6/6)    | 0/6       | 0/6          | 0% (0/6)      | 0/6   | 0/6    | 0/6          | 0% (0/6)      |
| 3   | HNZM          | Partridge chicken | Broiler  | 0/12                              | 4/12   | 4/12         | 33.3% (4/12)  | 2/12      | 2/12         | 16.7% (2/12)  | 0/12  | 0/12   | 0/12         | 0% (0/12)     |
| 4   | HNXZ2         | Liangfenghua      | Breeder  | 0/7                               | 0/7    | 0/7          | 0% (0/7)      | 3/7       | 4/7          | 71.4% (5/7)   | 0/7   | 0/7    | 0/7          | 0% (0/7)      |
| 5   | HNY1          | Jinghong          | Layer    | 4/15                              | 12/15  | 13/15        | 86.7% (13/15) | 0/15      | 0/15         | 0% (0/15)     | 1/15  | 0/15   | 0/15         | 6.7% (1/15)   |
| 6   | HNLK1         | Hyline            | Layer    | 0/15                              | 2/15   | 3/5          | 20% (3/15)    | 0/15      | 0/5          | 0% (0/15)     | 0/15  | 0/15   | 0/5          | 0% (0/15)     |
| 7   | HNLK2         | Jinghong          | Layer    | 0/8                               | 1/8    | 1/8          | 12.5% (1/8)   | 0/15      | 0/8          | 0% (0/15)     | 0/8   | 0/8    | 0/8          | 0% (0/8)      |
| 8   | HNZC1         | Jinghong          | Layer    | 0/6                               | 2/6    | 3/6          | 50% (3/6)     | 0/6       | 0/6          | 0% (0/6)      | 0/6   | 0/6    | 0/6          | 0% (0/6)      |
| 9   | HNSQ1         | Jinghong          | Layer    | 11/12                             | 11/12  | 5/5          | 92.7% (11/12) | 0/12      | 0/5          | 0% (0/12)     | 0/12  | 0/12   | 0/5          | 0% (0/12)     |
| 10  | HNLY1         | Jinghong          | Layer    | 2/4                               | 2/4    | 3/4          | 75% (3/4)     | 0/4       | 0/4          | 0% (0/4)      | 0/4   | 1/4    | 0/4          | 25% (1/4)     |
| 11  | HNYC1         | Jinghong          | Layer    | 12/14                             | 7/14   | 4/5          | 100%(14/14)   | 0/14      | 0/5          | 0% (0/14)     | 0/12  | 0/12   | 0/5          | 0% (0/12)     |
| 12  | SDCX1         | Jinghong          | Layer    | 9/9                               | 3/9    | 4/5          | 100% (9/9)    | 2/9       | 2/5          | 22.2% (2/9)   | 0/9   | 0/9    | 0/5          | 0% (0/9)      |
| 13  | SDSX          | Jinghong          | Layer    | 1/11                              | 2/11   | 2/6          | 54.5% (6/11)  | 0/11      | 0/6          | 0% (0/11)     | 0/11  | 0/11   | 0/6          | 0% (0/11)     |
| 14  | SDCW          | Hyline            | Layer    | 13/17                             | 15/17  | 5/6          | 94.1% (16/17) | 0/17      | 0/6          | 0% (0/17)     | 0/17  | 0/17   | 0/6          | 0% (0/17)     |
| 15  | SDCX2         | Jinghong          | Layer    | 7/8                               | 5/8    | 4/4          | 100% (8/8)    | 0/4       | 1/4          | 25% (1/4)     | 0/4   | 0/4    | 0/4          | 0% (0/4)      |
| 16  | HNSQ2         | Jinghong          | Layer    | 4/5                               | 4/5    | 1/2          | 80% (4/5)     | 0/2       | 0/2          | 0% (0/2)      | 0/2   | 0/2    | 0/2          | 0% (0/2)      |

|       |       |                   |         |       |       |     |                 |       |     |                |      |      |     |               |
|-------|-------|-------------------|---------|-------|-------|-----|-----------------|-------|-----|----------------|------|------|-----|---------------|
| 17    | HNSC  | Hyline            | Layer   | 11/14 | 11/14 | 4/6 | 100% (14/14)    | 2/14  | 0/6 | 14.3% (2/14)   | 2/14 | 1/14 | 2/6 | 21.4% (3/14)  |
| 18    | HNYC2 | Jinghong          | Layer   | 11/14 | 14/14 | 5/8 | 100% (14/14)    | 0/14  | 0/8 | 0% (0/14)      | 0/14 | 0/14 | 1/8 | 7.1% (1/14)   |
| 19    | HNZC2 | Jinghong          | Layer   | 10/13 | 11/13 | 5/5 | 92.3% (12/13)   | 2/13  | 1/5 | 15.4% (2/13)   | 1/13 | 0/13 | 1/5 | 7.7% (1/13)   |
| 20    | HNXZ3 | Partridge chicken | Breeder | 4/8   | 4/8   | 5/5 | 87.5% (7/8)     | 0/9   | 0/5 | 0% (0/9)       | 0/8  | 0/8  | 0/5 | 0% (0/8)      |
| 21    | HNQX  | Jinghong          | Layer   | 6/9   | 9/9   | 5/5 | 100% (9/9)      | 0/10  | 0/5 | 0% (0/10)      | 0/9  | 0/9  | 0/5 | 0% (0/9)      |
| 22    | HNZC3 | Jinghong          | Layer   | 2/5   | 2/5   | 2/5 | 40% (2/5)       | 0/5   | 0/5 | 0% (0/5)       | 0/5  | 0/5  | 0/5 | 0% (0/5)      |
| 23    | HNY2  | Jinghong          | Layer   | 0/5   | 0/5   | 0/5 | 40% (2/5)       | 0/5   | 0/5 | 0% (0/5)       | 0/5  | 0/5  | 0/5 | 0% (0/5)      |
| 24    | HNPDS | Hyline            | Layer   | 0/6   | 1/6   | 1/5 | 16.7% (1/6)     | 1/6   | 1/5 | 16.7% (1/6)    | 0/6  | 0/5  | 0/5 | 0% (0/6)      |
| 25    | HNL2  | Jinghong          | Layer   | 3/6   | 4/6   | 3/5 | 100% (6/6)      | 0/6   | 0/5 | 0% (0/6)       | 0/6  | 0/5  | 0/5 | 0% (0/6)      |
| 26    | HNZC4 | Hyline            | Layer   | 6/8   | 8/8   | 5/5 | 100% (8/8)      | 0/8   | 1/5 | 12.5% (1/8)    | 0/8  | 0/5  | 0/5 | 0% (0/8)      |
| 27    | HNSX  | Jinghong          | Layer   | 5/5   | 5/5   | 5/5 | 100% (5/5)      | 0/5   | 0/5 | 0% (0/5)       | 0/5  | 0/5  | 0/5 | 0% (0/5)      |
| 28    | HNZC5 | Jinghong          | Layer   | 4/7   | 5/7   | 3/5 | 71.4% (5/7)     | 0/7   | 0/5 | 0% (0/7)       | 0/7  | 0/7  | 0/5 | 0% (0/7)      |
| 29    | HNFQ  | Hyline            | Layer   | 2/11  | 1/11  | 1/5 | 18.2% (2/11)    | 1/11  | 2/5 | 18.2% (2/11)   | 0/11 | 0/11 | 0/5 | 0% (0/11)     |
| 30    | HNWS  | Muyuan Red        | Layer   | 2/20  | 3/20  | 3/5 | 15% (3/20)      | 18/20 | 5/5 | 90% (18/20)    | 0/20 | 0/20 | 0/5 | 0% (0/20)     |
| Total |       |                   |         |       |       |     | 69.5% (203/292) |       |     | 14.4% (42/292) |      |      |     | 4.7% (13/277) |
